# Supplementary material
Source: PubMed Central journal article supplement (PMC11665016)
Supplement: NIHPP2402.05016v4-supplement-1.pdf [file NIHPP2402.05016v4-supplement-1.pdf]

## SUPPLEMENTAL TABLES

**Table S1.** Fast Kinase-Substrate Enrichment Analysis (fkSEA) Input File Format. [(R): Required, (O): Optional]

| <b>ProteinAccession<br/>(R)</b> | <b>log2FC<br/>(R)</b> | <b>PhosphoSiteID<br/>(O)</b> | <b>pValue<br/>(O)</b> |
|---------------------------------|-----------------------|------------------------------|-----------------------|
| P02545                          | -1.8                  | S22                          | 0.0025                |
| P02545                          | -0.95                 | S390                         | 0.03                  |
| P17612                          | 2.1                   | T198                         | 0.028                 |
| P08670                          | -3.48                 | S56                          | 0.024                 |

**Table S2.** Fast Kinase-Substrate Enrichment Analysis (fKSEA) Output File Format. [(H|A): HUGO or Accession ID, (IE): If Exists]

| <b>KinaseID<br/>(H A)</b> | <b>TargetID<br/>(H A)</b> | <b>PhosphoSiteID<br/>(IE)</b> | <b>log2FC</b> | <b>KinaseActivity</b> | <b>pValue</b> |
|---------------------------|---------------------------|-------------------------------|---------------|-----------------------|---------------|
| AKT1                      | LMNA                      | S22                           | -1.8          | -1.3                  | 0.0025        |
| AKT1                      | LMNA                      | S390                          | -0.95         | -1.3                  | 0.03          |
| PRKACA                    | PRKACA                    | T198                          | 2.1           | 0.7                   | 0.028         |
| PRKACA                    | VIM                       | S56                           | -3.48         | 0.7                   | 0.024         |

**Table S3.** Visualization Input File Format. [(R): Required, (O): Optional, (P): Phosphorylation]

| <b>Kinase ID</b><br><b>(R)</b> | <b>Target ID</b><br><b>(R)</b> | <b>Kinase Size</b><br>(O) | <b>Kinase Activity</b><br>(O) | <b>Edge Weight</b><br>(O) | <b>Edge Hue</b><br>(O) | <b>Target Size</b><br>(O) | <b>PhosphoSite ID</b><br>(O) | <b>log2FC</b><br>(O)<br>(P) | <b>pValue</b><br>(O)<br>(P) |
|--------------------------------|--------------------------------|---------------------------|-------------------------------|---------------------------|------------------------|---------------------------|------------------------------|-----------------------------|-----------------------------|
| AKT1                           | LMNA                           | 1.2                       | -1.3                          | 1                         | 1.44                   | 0.9                       | S22                          | -1.8                        | 0.0025                      |
| AKT1                           | LMNA                           | 1.2                       | -1.3                          | 1                         | 1.44                   | 0.9                       | S390                         | -0.95                       | 0.03                        |
| PRKACA                         | PRKACA                         | 3                         | 0.7                           | 1.5                       | 4.28                   | 3                         | T198                         | 2.1                         | 0.028                       |
| PRKACA                         | VIM                            | 3                         | 0.7                           | 3.8                       | 0.07                   | 1.12                      | S56                          | -3.48                       | 0.024                       |
